# Supplementary material for: Somatic cell reprogramming-free generation of genetically modified pigs
Source: PubMed Central journal article supplement — Sci Adv. 2016 Sep 14;2(9):e1600803. doi: 10.1126/sciadv.1600803 (PMC5023319; doi:10.1126/sciadv.1600803), 2016-09-14
Supplement: 1600803_SM.pdf [file 1600803_SM.pdf]

## Supplementary Materials for **Somatic cell reprogramming-free generation of genetically modified pigs**

Fuminori Tanihara, Tatsuya Takemoto, Eri Kitagawa, Shengbin Rao, Lanh Thi Kim Do, Akira Onishi, Yukiko Yamashita, Chisato Kosugi, Hitomi Suzuki, Shoichiro Sembon, Shunichi Suzuki, Michiko Nakai, Masakazu Hashimoto, Akihiro Yasue, Munehide Matsuhisa, Sumihare Noji, Tatsuya Fujimura, Dai-ichiro Fuchimoto, Takeshige Otoi

Published 14 September 2016, *Sci. Adv.* **2**, e1600803 (2016)  
DOI: 10.1126/sciadv.1600803

### **This PDF file includes:**

- Supplementary Text
- fig. S1. Optimization of the time period between IVF initiation and electroporation.
- fig. S2. Genome editing of the *MSTN* gene.
- table S1. Sequence of the *MSTN* target region in piglets.
- table S2. Off-target analysis of the piglets by deep sequencing.
- table S3. Sequence analysis of the *MSTN* gene in piglets #4 and #8 by deep sequencing.
- table S4. Oligonucleotide sequences used to generate sgRNA.
- table S5. Oligonucleotide sequences used for off-target analysis.

## **Supplementary Text**

All animal care and experiments were carried out in accordance with the Guidelines for Animal Experiments of Tokushima University and the National Institute of Agrobiological Sciences. This study was approved by the Ethics Committee of Tokushima University for Animal Research (Approval number: T28-21) and the Safety Management Section of National Institute of Agrobiological Sciences (Approval number: H18-038).

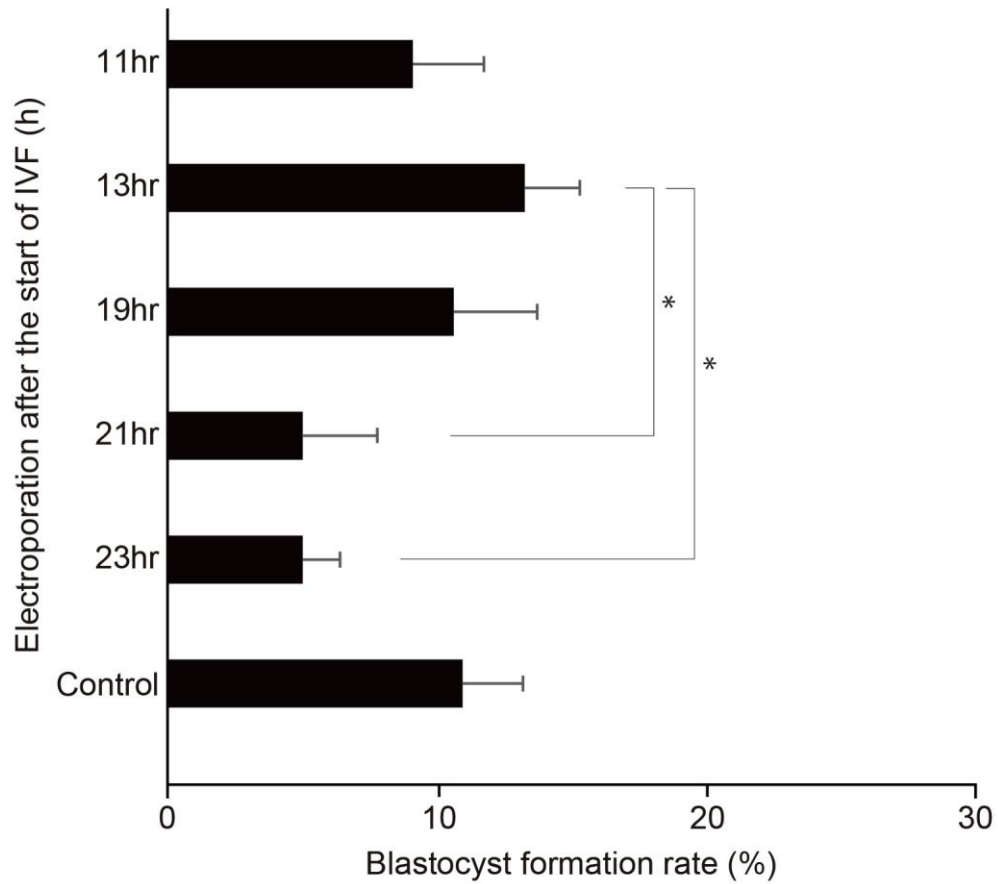

**fig. S1. Optimization of the time period between IVF initiation and electroporation.** Presumptive zygotes were electroporated with *Cas9* mRNA and *FGF10* guide RNA at 11, 13, 19, 21, and 23 h after IVF initiation. After incubation of the electroporated zygotes for 7 d, the blastocyst formation rates were determined. \* $P < 0.05$  using one-way ANOVA. Error bars, mean  $\pm$  s.e.m.

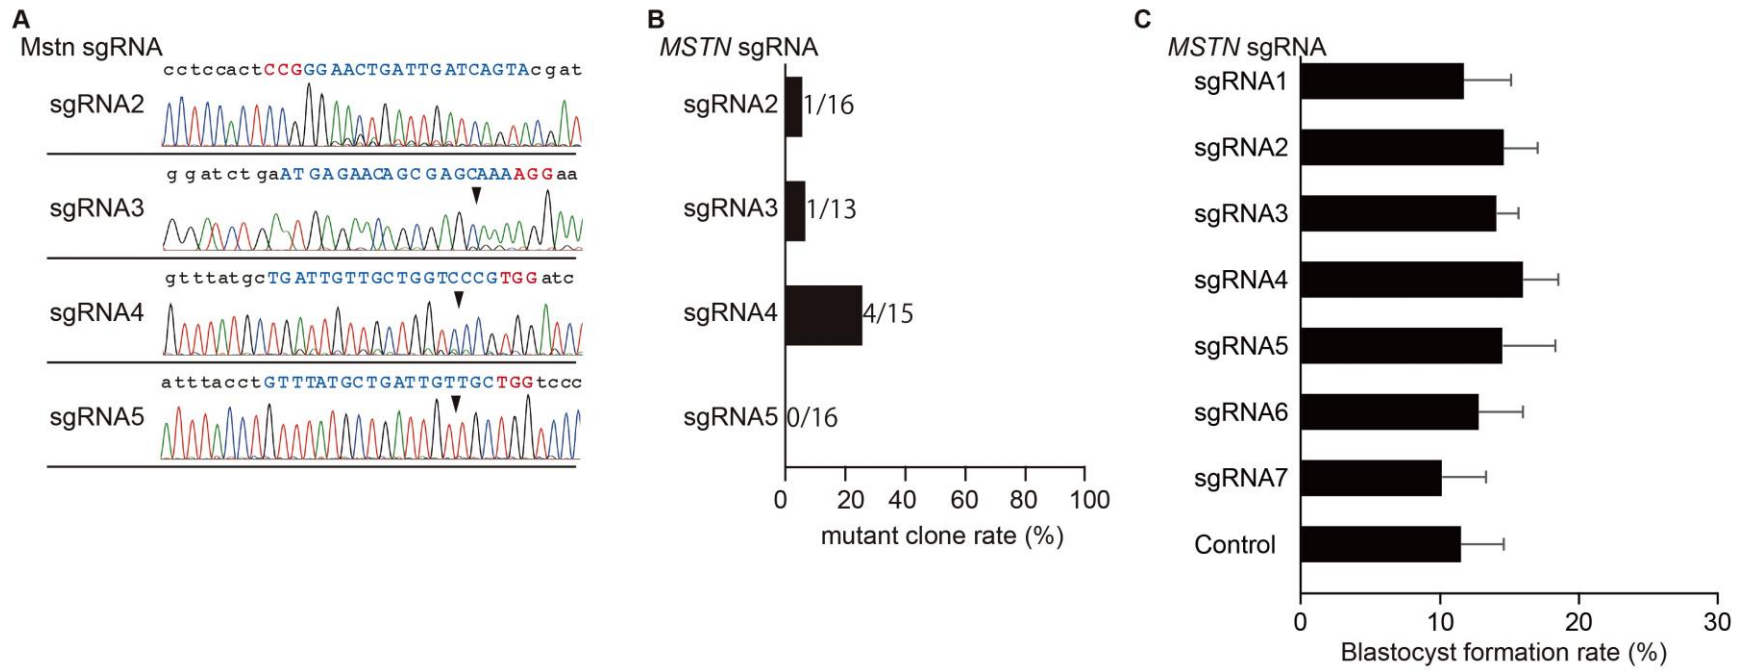

**fig. S2. Genome editing of the *MSTN* gene.** (A) Genomic *MSTN* sequences in the blastocysts formed from electroporated zygotes. (B) Frequency of mutations detected in the PCR amplicons. (C) Blastocyst formation rates of the electroporated zygotes. Error bars, mean  $\pm$  s.e.m.

**table S1. Sequence of the *MSTN* target region in piglets.** The nucleotides in blue represent target sequences, while those in red represent PAM sequences.

| piglet | <i>MSTN</i> sgRNA | Genome sequence                         | indels          | frequency |
|--------|-------------------|-----------------------------------------|-----------------|-----------|
|        | sgRNA1 target     | ctgatcAATCAGTTCCCGGAGTGGAGGagc          |                 |           |
| #1     |                   | ctgatcAATCAGTTCCCGGAGTGGAGGagc          | none            | 9/16      |
|        |                   | ctgatcAATCAGTTCCCGGAGGAGGAGTTCTGGAGGagc | +10bp           | 7/16      |
| #5     |                   | ctgatcAATCAGTTCCCGGAGTGGAGGagc          | none            | 11/14     |
|        |                   | ctgatcAATCAGTTCCCGGAG-----Gagc          | -5bp            | 3/14      |
| #6     |                   | ctgatcAATCAGTTCCCGGAGTGGAGGagc          | none            | 8/14      |
|        |                   | ctgatcAATCAGTTCCCGGAGATGGAGGagc         | +1bp            | 6/14      |
|        | sgRNA7 target     | aagGAAAATGTGGAAAAAGAGGGGctg             |                 |           |
| #2     |                   | aagGAAAATGTGGAAA---AGGGGctg             | -3bp (inframe)  | 5/15      |
|        |                   | aagGAAAAT--GGAAAATGAGGGGctg             | -2bp, m1bp      | 4/15      |
|        |                   | aagGAAAATGTGGAAAAAGAGGGGctg             | +1bp            | 3/15      |
|        |                   | aagGAAAATGTGGAAAAAGAGGGGctg             | none            | 3/15      |
| #7     |                   | a-----AGGGGctg                          | -18bp (inframe) | 7/15      |
|        |                   | aagGAAAATGTGGAAAAAGAGGGGctg             | +1bp            | 6/15      |
|        |                   | aagGAAAATGTG-----GAGGGGctg              | -6bp (inframe)  | 1/15      |
|        |                   | aagGAAAATGTGGAAAAAGAGGGGctg             | none            | 1/15      |
| #8     |                   | aagGAAAATGTGGAAAAAGAGGGGctg             | +1bp            | 7/13      |
|        |                   | aagGAAAATGTGGAAAAAGAGGGGctg             | none            | 6/13      |
| #9     |                   | aagGAAAATGT-----GGGctg                  | +10bp           | 10/12     |
|        |                   | aagGAAAATGTGGAAAAAGAGGGGctg             | none            | 2/12      |
| #10    |                   | aagGAAAATGTGGAAAAAGAGGGGctg             | none            | 15/15     |

**table S2. Off-target analysis of the piglets by deep-sequencing.**

| piglet |                       | Genome sequence              | mismatch | locus (strand)                   | frequency       |
|--------|-----------------------|------------------------------|----------|----------------------------------|-----------------|
|        | sgRNA6 target         | gcTGTTCTCATTTCAGATCCA CGG    |          |                                  |                 |
| #4     | Off-target candidates | OT4 aaTGTTCTCATGCAGATCCAGGG  | 1bp      | chr16: 3,206,113-3,206,133 (-)   | 2195/2209 (99%) |
|        |                       | OT5 tgCTTTCTCATTTCAGATCCATGG | 2bp      | chr11: 75,202,772-75,202,792 (-) | 2168/2181 (99%) |
|        |                       | OT6 gtTTTCTCATTTCAGATCC TAGG | 2bp      | chr1:200,634,452-200,634,472 (-) | 2734/2754 (99%) |
|        | sgRNA7 target         | agGAAAATGTGGAAAAAGAG GGG     |          |                                  |                 |
| #8     | Off-target candidates | OT1 aaGAAAATATGGAAAAAGAGAGG  | 1bp      | chr3:96,400,245-96,400,265 (+)   | 2896/2924 (99%) |
|        |                       | OT2 atGAAAATGTGAAAAAGAGAGG   | 1bp      | chr7:115,969,797-115,969,817 (-) | 2843/2861 (99%) |
|        |                       | OT3 atGAAAAC TTGGAAAAAGAGAGG | 2bp      | chr7:46,099,859-46,099,879 (-)   | 3025/3047 (99%) |

**table S3. Sequence analysis of the *MSTN* gene in piglets #4 and #8 by deep sequencing.**

| piglet |               | Genome sequence                | indels     | frequency       |
|--------|---------------|--------------------------------|------------|-----------------|
| #4     | sgRNA6 target | cgcTGTTCTCATTTCAGATCCA CGGgac  |            |                 |
|        |               | cgcTGTTCTCATTTCAGAT TCCACGGgac | +1bp       | 1486/2560 (58%) |
|        |               | cgcTGTTCTCATTTCAGA GAACACGGgac | +1bp, m2bp | 954/2560 (38%)  |
|        |               | cgcTGTTCTCATTCA----- GGgac     | -7bp       | 50/2560 (2%)    |
| #8     | sgRNA7 target | aagGAAAATGTGGAAAAAGAG GGGctg   |            |                 |
|        |               | aagGAAAATGTGGAAAAA AGAGGGGctg  | +1bp       | 1391/2849 (49%) |
|        |               | aagGAAAATGTGGAAAAAGAGGGGctg    | none       | 1438/2849 (50%) |

**table S4. Oligonucleotide sequences used to generate sgRNA.**

|             | Forward oligos         | Reverse oligos          |
|-------------|------------------------|-------------------------|
| Fgf10 sgRNA | TAGGAAAAGGAGCTCCCAGGAG | AAACCTCCTGGGAGCTCCTTTT  |
| Mstn sgRNA1 | TAGGCCACTCCGGGAACTGATT | AAACCCACTCCGGGAACTGATT  |
| Mstn sgRNA2 | TAGGTACTGATCAATCAGTTCC | AAACGGAAGCTGATTGATCAGTA |
| Mstn sgRNA3 | TAGGATGAGAACAGCGAGCAA  | AAACTTTGCTCGCTGTTCTCAT  |
| Mstn sgRNA4 | TAGGTGATTGTTGCTGGTCCCG | AAACCGGGACCAGCAACAATCA  |
| Mstn sgRNA5 | TAGGGTTTATGCTGATTGTTGC | AAACGCAACAATCAGCATAAAC  |
| Mstn sgRNA6 | TAGGTGTTCTCATTCAGATCCA | AAACTGGATCTGAATGAGAACA  |
| Mstn sgRNA7 | TAGGGAAAATGTGGAAAAGAG  | AAACCTCTTTTTCCACATTTTC  |

**table S5. Oligonucleotide sequences used for off-target analysis.**

|                | common sequence            | specific sequence                 |
|----------------|----------------------------|-----------------------------------|
| forward primer | sgRNA6 target              | ACACTCTTTCCCTACACGACGCTCTTCCGATCT |
|                | OT1                        | ACCTGTTTATGCTGATTGTTGCT           |
|                | OT2                        | GTGATCTTCACCTGCGCAG               |
|                | OT3                        | GTGCTCAGCCCTGACTCAG               |
|                | sgRNA7 target              | TCGGAGAGACGTTCCCCTG               |
|                | OT4                        | TGGTCCCGTGGATCTGAATG              |
|                | OT5                        | AGGAATGGCCCTAGAAAAGGC             |
| OT6            | CCAGACTTCCTATTTTCCCTCAACA  |                                   |
| reverse primer | sgRNA6 target              | CAGGCGAATTTAATCAGGCCA             |
|                | OT1                        | GTGTTTTGTCTCCACATACATGCA          |
|                | OT2                        | CTGACGGCACTGGAACCTT               |
|                | OT3                        | GGCCTAAAATCCTGAGGCCT              |
|                | sgRNA7 target              | GATGGACGCCCTCTGAATG               |
|                | OT4                        | GTGTTTTGTCTCCACATACATGCA          |
|                | OT5                        | TGTGGATCTGAGCATGAAAGG             |
| OT6            | TGTGGAAGATGAATTGTTTTAAAGCT |                                   |
|                |                            | TGCATTATGTTACAGAATTTGGACT         |
